# Supplementary material
Source: PubMed Central journal article supplement (PMC4550531)
Supplement: NIHMS704639-supplement-Online_supplemental_tables.pdf [file NIHMS704639-supplement-Online_supplemental_tables.pdf]

**Online supplemental Table I. Comparison of participants with and without MRI information.**

|                                | Participants with biomarker measures at exam 6 |                                  |                          |           |
|--------------------------------|------------------------------------------------|----------------------------------|--------------------------|-----------|
|                                | TOTAL (N=3456)                                 | Available MRI measures* (N=2233) | No MRI measures (N=1223) | P-value** |
| Women                          | 1826 (52.8)                                    | 1181 (52.9)                      | 645 (52.7)               | 0.93      |
| Age at examination 6 (years)   | 59.2 (9.7)                                     | 58.3 (9.5)                       | 60.9 (10.0)              | <0.0001   |
| Systolic blood pressure (mmHg) | 128 (19)                                       | 127 (18)                         | 132 (19)                 | <0.0001   |
| Hypertension treatment         | 969 (28.1)                                     | 552 (24.8)                       | 417 (34.2)               | <0.0001   |
| Diabetes                       | 375 (11.0)                                     | 209 (9.5)                        | 166 (14.0)               | <0.0001   |
| Smoking                        | 529 (15.3)                                     | 309 (13.8)                       | 220 (18.0)               | 0.001     |
| History of CVD                 | 387 (11.2)                                     | 197 (8.8)                        | 190 (15.5)               | <0.0001   |
| History of atrial fibrillation | 109 (3.2)                                      | 46 (2.1)                         | 63 (5.2)                 | <0.0001   |
| Left ventricular hypertrophy   | 24 (0.70)                                      | 6 (0.30)                         | 18 (1.5)                 | <0.0001   |
| Education group                |                                                |                                  |                          |           |
| <High school degree            | 178 (5.2)                                      | 76 (3.4)                         | 102 (8.3)                | <0.0001   |
| High school degree             | 1991 (57.6)                                    | 1296 (58.0)                      | 695 (56.8)               |           |
| ≥College degree                | 1151 (33.3)                                    | 861 (38.6)                       | 290 (23.7)               |           |
| Missing                        | 136 (3.9)                                      | 0 (0.0)                          | 136 (11.1)               |           |
| BNP, pg/mL                     | 8.5 (4.0, 18.9)                                | 7.8 (4.0, 16.8)                  | 10.1 (4.0, 24.1)         | <0.0001   |
| hs-CRP, mg/L                   | 2.0 (0.9, 4.7)                                 | 1.9 (0.9, 4.4)                   | 2.4 (1.1, 5.4)           | <0.0001   |
| Urine albumin (mg/L)           | 5.4 (3.0, 11.2)                                | 5.1 (3.0, 9.9)                   | 6.0 (3.0, 14.1)          | 0.0002    |
| GDF-15, ng/L                   | 1046 (815, 1362)                               | 1000 (800, 1294)                 | 1128 (855, 1489)         | <0.0001   |
| sST2, ng/mL                    | 20.9 (16.7, 26.1)                              | 20.6 (16.6, 25.6)                | 21.7 (16.8, 27.0)        | 0.0004    |

Footnote: Footnote: Continuous variables are presented as mean (standard deviation) for blood pressure as median (25<sup>th</sup>, 75<sup>th</sup> percentile) for laboratory assays, and for discrete variables as numbers (percentages). MRI= magnetic resonance imaging, NP= neuropsychological test, CVD= cardiovascular disease, BNP= B-type natriuretic peptide, GDF-15= growth differentiation factor-15.

\*Includes participants who had MRI measures but were excluded from the main analysis due to prevalent dementia, stroke, or other neurological conditions.

\*\*P-value calculated using a T-test for continuous variables, Chi-square test for categorical variables, and Kruskal-Wallis test for non-normally distributed variables.

**Online supplemental Table II. Linear regression results for the association between biomarkers and MRI/NP measures, stratified by extensive white matter hyperintensities volume.**

| Outcome                         | Biomarker | Extensive white matter hyperintensities |                |         |     |                |         | P-value for interaction* |
|---------------------------------|-----------|-----------------------------------------|----------------|---------|-----|----------------|---------|--------------------------|
|                                 |           | No                                      |                |         | Yes |                |         |                          |
|                                 |           | N                                       | Beta (SE)      | P-value | N   | Beta (SE)      | P-value |                          |
| Total cerebral brain volume**   | GDF-15†   | 1514                                    | -0.67 (0.22)   | 0.003   | 231 | -1.68 (0.60)   | 0.006   | <0.0001                  |
|                                 | sST2†     | 1511                                    | -0.41 (0.21)   | 0.05    | 231 | -0.051 (0.58)  | 0.93    | 0.38                     |
| Visual Reproductions Delayed*** | GDF-15†   | 1511                                    | -0.51 (0.24)   | 0.04    | 229 | -0.52 (0.66)   | 0.44    | 0.16                     |
|                                 | sST2†     | 1508                                    | -0.51 (0.24)   | 0.03    | 229 | -0.61 (0.62)   | 0.33    | 0.24                     |
| Trails B – Trails A†***         | GDF-15†   | 1498                                    | -0.012 (0.016) | 0.43    | 228 | 0.033 (0.052)  | 0.52    | 0.02                     |
|                                 | sST2†     | 1495                                    | -0.008 (0.015) | 0.61    | 228 | -0.043 (0.049) | 0.38    | 0.03                     |

†Natural log (ln) transformed

\*P-value for interaction between biomarker and extensive white matter hyperintensities (yes vs. no)

\*\*Models are adjusted for age at MRI, age at MRI squared, sex, time between examination 6 and MRI, FSRP components (systolic blood pressure, hypertension treatment, diabetes, smoking, history of CVD, history of AF), BNP, hsCRP, and urine albumin.

\*\*\*Models are adjusted for age at NP, sex, education group (<high school degree, high school degree, ≥college graduate) and time between examination 6 and NP, FSRP components (systolic blood pressure, hypertension treatment, diabetes, smoking, history of CVD, history of AF), BNP, hsCRP, and urine albumin.
